# Supplementary material for: Validation of the “Perceptions Regarding pRE-Symptomatic Alzheimer’s Disease Screening” (PRE-ADS) Questionnaire in the German Population: Attitudes, Motivations, and Barriers to Pre-Symptomatic Dementia Screening
Source: PubMed Central journal article supplement — J Alzheimers Dis. 2024 Jan 2;97(1):309–25. doi: 10.3233/JAD-230961 (PMC10789340; doi:10.3233/jad-230961), 2024-01-02
Supplement: jad-97-jad230961-s001.pdf [file jad-97-jad230961-s001.pdf]

# Supplementary Material

## Validation of the “Perceptions regarding pRE-symptomatic Alzheimer’s Disease Screening” (PRE-ADS) Questionnaire in the German Population: Attitudes, Motivations, and Barriers to Pre-Symptomatic Dementia Screening

### Supplementary Material 1.

STROBE Statement—Checklist of items that should be included in reports of *cross-sectional studies*

|                           | Item No | Recommendation                                                                                                                                                                                       | Page No |
|---------------------------|---------|------------------------------------------------------------------------------------------------------------------------------------------------------------------------------------------------------|---------|
| <b>Title and abstract</b> | 1       | (a) Indicate the study’s design with a commonly used term in the title or the abstract                                                                                                               | 2       |
|                           |         | (b) Provide in the abstract an informative and balanced summary of what was done and what was found                                                                                                  | 2       |
| <b>Introduction</b>       |         |                                                                                                                                                                                                      |         |
| Background/rationale      | 2       | Explain the scientific background and rationale for the investigation being reported                                                                                                                 | 3       |
| Objectives                | 3       | State specific objectives, including any prespecified hypotheses                                                                                                                                     | 7       |
| <b>Methods</b>            |         |                                                                                                                                                                                                      |         |
| Study design              | 4       | Present key elements of study design early in the paper                                                                                                                                              | 7       |
| Setting                   | 5       | Describe the setting, locations, and relevant dates, including periods of recruitment, exposure, follow-up, and data collection                                                                      | 7       |
| Participants              | 6       | (a) Give the eligibility criteria, and the sources and methods of selection of participants                                                                                                          | 7       |
| Variables                 | 7       | Clearly define all outcomes, exposures, predictors, potential confounders, and effect modifiers. Give diagnostic criteria, if applicable                                                             | n.a.    |
| Data sources/measurement  | 8*      | For each variable of interest, give sources of data and details of methods of assessment (measurement). Describe comparability of assessment methods if there is more than one group                 | n.a.    |
| Bias                      | 9       | Describe any efforts to address potential sources of bias                                                                                                                                            | n.a.    |
| Study size                | 10      | Explain how the study size was arrived at                                                                                                                                                            | 8       |
| Quantitative variables    | 11      | Explain how quantitative variables were handled in the analyses. If applicable, describe which groupings were chosen and why                                                                         | n.a.    |
| Statistical methods       | 12      | (a) Describe all statistical methods, including those used to control for confounding                                                                                                                | 9       |
|                           |         | (b) Describe any methods used to examine subgroups and interactions                                                                                                                                  | 9       |
|                           |         | (c) Explain how missing data were addressed                                                                                                                                                          | n.a.    |
|                           |         | (d) If applicable, describe analytical methods taking account of sampling strategy                                                                                                                   | n.a.    |
|                           |         | (e) Describe any sensitivity analyses                                                                                                                                                                | n.a.    |
| <b>Results</b>            |         |                                                                                                                                                                                                      |         |
| Participants              | 13*     | (a) Report numbers of individuals at each stage of study—e.g., numbers potentially eligible, examined for eligibility, confirmed eligible, included in the study, completing follow-up, and analysed | 11      |
|                           |         | (b) Give reasons for non-participation at each stage                                                                                                                                                 | n.a.    |
|                           |         | (c) Consider use of a flow diagram                                                                                                                                                                   | n.a.    |
| Descriptive data          | 14*     | (a) Give characteristics of study participants (eg demographic, clinical, social) and information on exposures and potential confounders                                                             | 11      |
|                           |         | (b) Indicate number of participants with missing data for each variable of interest                                                                                                                  | n.a.    |

|                          |     |                                                                                                                                                                                                              |        |
|--------------------------|-----|--------------------------------------------------------------------------------------------------------------------------------------------------------------------------------------------------------------|--------|
| Outcome data             | 15* | Report numbers of outcome events or summary measures                                                                                                                                                         |        |
| Main results             | 16  | (a) Give unadjusted estimates and, if applicable, confounder-adjusted estimates and their precision (eg, 95% confidence interval). Make clear which confounders were adjusted for and why they were included | 12-16  |
|                          |     | (b) Report category boundaries when continuous variables were categorized                                                                                                                                    | 10, 11 |
|                          |     | (c) If relevant, consider translating estimates of relative risk into absolute risk for a meaningful time period                                                                                             | n.a.   |
| Other analyses           | 17  | Report other analyses done—eg analyses of subgroups and interactions, and sensitivity analyses                                                                                                               | 14-16  |
| <b>Discussion</b>        |     |                                                                                                                                                                                                              |        |
| Key results              | 18  | Summarise key results with reference to study objectives                                                                                                                                                     | 13     |
| Limitations              | 19  | Discuss limitations of the study, taking into account sources of potential bias or imprecision. Discuss both direction and magnitude of any potential bias                                                   | 16     |
| Interpretation           | 20  | Give a cautious overall interpretation of results considering objectives, limitations, multiplicity of analyses, results from similar studies, and other relevant evidence                                   | 16     |
| Generalisability         | 21  | Discuss the generalizability (external validity) of the study results                                                                                                                                        | 16     |
| <b>Other information</b> |     |                                                                                                                                                                                                              |        |
| Funding                  | 22  | Give the source of funding and the role of the funders for the present study and, if applicable, for the original study on which the present article is based                                                | 24     |

\*Give information separately for exposed and unexposed groups.

---

## Perceptions regarding pRE-symptomatic DEMentia testing (PRE-ADS)

### BESCHREIBUNG DER DURCHFÜHRUNG

Im Rahmen unserer Studie machen Sie keine Angaben zu Ihrer Person. Wir werden Sie niemals nach Ihrem Namen, Ihrer Adresse, Bankverbindung oder ähnlichen Angaben fragen. Uns sind lediglich allgemeine Informationen, welche wir in den Online-Fragebögen abfragen, wichtig. Diese beinhalten Fragen nach dem Alter, dem Geschlecht, dem höchsten Bildungsabschluss, dem Beruf sowie Ihrer Erfahrung mit Menschen mit Demenz bzw. ob Sie bereits einen Kurs über Demenz besucht haben. Im Anschluss daran finden Sie den zu validierenden Fragebogen.

### DEMOGRAPHISCHE DATEN

Bitte wählen Sie zu jeder der folgenden Fragen eine Antwort aus:

#### Geschlecht

---

- weiblich
- männlich
- divers

#### Wie alt sind Sie?

\_\_\_\_\_ Jahre

#### Familienstand

- verheiratet
- in Partnerschaft
- geschieden
- ledig
- Witwe:r oder Partner verstorben

**Bitte geben Sie Ihren höchsten Bildungsabschluss an (nur eine Antwort möglich).**

- kein Abschluss
- Sonderschulabschluss
- Hautschul-/Volksschulabschluss
- Realschulabschluss/polytechnische Oberschule
- (Fach-)Abitur
- Anerkannte Berufsausbildung

- Bachelor
- Diplom/Master/Staatsexamen
- Promotion
- Weitere...

**Sind Sie berufstätig?**

- Schüler:in
- Student:in
- arbeitslos
- Retner:in
- ich arbeite in einem Pflegeberuf
- ich arbeite in einem Therapeutischen Beruf
- ich bin Arzt/Ärztin
- Weitere...

**Haben Sie bereits an einem Kurs (Fortbildung oder Seminar) über Demenz teilgenommen?**

- Ja
- Nein

**GESUNDHEITZUSTAND**

Bitte wählen Sie jeweils eine der folgenden Antworten aus.

**Wie würden Sie Ihren Gesundheitsstatus einschätzen?**

- 
- ausgezeichnet
  - sehr gut
  - gut
  - mittelmäßig
  - schlecht

**Welche Aussage beschreibt Ihren allgemeinen Gefühlszustand am besten?**

- Ich bin die meiste Zeit glücklich / ohne Depressionen

- Ich fühle mich manchmal depressiv
- Ich fühle mich meistens depressiv
- Ich leide unter schweren Depressionen

**Wie schätzen Sie Ihr Angst- oder Sorgeniveau ein?**

- Ich bin nie ängstlich oder fühle mich beunruhigt.
- Manchmal fühle ich mich ängstlich oder beunruhigt.
- An den meisten Tagen fühle ich mich ängstlich oder beunruhigt.
- Ich fühle mich immer ängstlich oder beunruhigt.

---

ÜBERZEUGUNGEN / EINSTELLUNGEN / BEFÜRCHTUNGEN

**Bezüglich der Befürchtungen, dass Demenz-Symptome auftreten, glauben Sie:**

- 
- Ich habe ein höheres Risiko, an Alzheimer/Demenz zu erkranken.
  - Ich werde eines Tages an Alzheimer/Demenz erkranken.
  - Ich habe mehr Probleme mit meinem Gedächtnis als andere in meinem Alter.
  - Ich befürchte nicht, an Alzheimer/Demenz zu erkranken.

**Bezüglich einer möglichen Demenz-Therapie glauben Sie:**

- Ich glaube nicht, dass es derzeit eine Behandlung für Alzheimer/Demenz gibt.
- Ich glaube, dass es in den nächsten 5 Jahren eine wirksame Behandlung für Alzheimer/Demenz gibt.
- Ich glaube, dass es bereits eine Therapie für Alzheimer/Demenz gibt.
- Ich weiß nicht, ob es eine Therapie gegen Alzheimer/Demenz gibt.

---

ERFAHRUNGEN MIT ALZHEIMER/DEMENTZ

**Gibt es in Ihrer Familie Personen mit einer Alzheimer-Demenz?**

- 
- Ja
  - Nein (Gehe zu Abschnitt: Frühere Erfahrungen mit Alzheimer/Demenz)

**Wie hoch ist Ihr Verwandtschaftsgrad zu der Person mit Alzheimer/Demenz?**

- Urgroßvater / Urgroßmutter
- Großvater/Großmutter
- Vater/Mutter
- Bruder/Schwester
- Tante/Onkel
- Kusun/Kusine

**Wie viele Personen in Ihrer Familie (einschließlich früherer Generationen) hatten Alzheimer/Demenz?**

\_\_\_\_\_ Personen

**In wie vielen verschiedenen Generationen haben Sie einen Verwandten mit Alzheimer/Demenz?**

- Eins
- Zwei
- Drei
- Vier

**Wie alt ist der jüngste Verwandte mit Symptomen der Alzheimer/Demenz?**

- jünger als 55 Jahre
- 56-60 Jahre
- 61-65 Jahre
- 66-70 Jahre
- älter als 70 Jahre

---

**FRÜHERE ERFAHRUNGEN MIT ALZHEIMER/DEMENTZ I**

**Pflegen Sie eine Person mit Alzheimer/Demenz?**

- 
- Ja
  - Nein (Gehe zu Abschnitt: Frühere Erfahrungen mit Alzheimer/Demenz II)

**Die Person, die ich pflege/pflegte, ist/war:**

- mein Urgroßvater/Urgroßmutter
- mein Großvater/meine Großmutter
- mein Vater/meine Mutter
- mein Bruder/meine Schwester
- mein Onkel/meine Tante
- mein Kusine/meine Kusine
- mein Partner/meine Partnerin
- ein Freund/eine Freundin
- Weitere...

**In welchem Demenzstadium befindet/befand sich die Person, die Sie pflegen?**

- Leichte kognitive Beeinträchtigung
- Leichte Demenz
- Mittlere Demenz
- Schwere Demenz

**Wie viele Jahren pflegen/pflegten Sie?**

- 1 - 3 Jahre
- 3 - 5 Jahre
- mehr als 5 Jahre

Wenn Sie in der Vergangenheit eine Person mit Alzheimer/Demenz gepflegt haben, vor wieviel Jahren war das?

\_\_\_\_\_ Jahre

**Wie viele Stunden in der Woche sind Sie in ihrer Rolle als Pflegende:r tätig?**

- 3 – 6
- 7 – 15
- den ganzen Tag

**Haben Sie sich freiwillig dafür entschieden, die Pflege zu übernehmen?**

- Ja
- Nein

---

FRÜHERE ERFAHRUNGEN MIT ALZHEIMER/DEMENZ II

**Kennen Sie eine Person mit Demenz?**

- 
- Ja
  - Nein

UNTERSUCHUNGEN IN BEZUG AUF ALZHEIMER/DEMENZ

**Wurden Sie jemals auf ein erhöhtes Risiko für Alzheimer/Demenz getestet oder untersucht?**

- 
- Ja
  - Nein (Gehe zu Abschnitt: Akzeptanz des Demenz-Screenings und Bedarf an Wissen)

**Falls ja, diese Untersuchung beinhaltete:**

- Kurzer Fragebogen / Kognitive Untersuchung
  - Gentest mit Blutprobe
  - Magnetresonanztomographie (MRT) oder PET-Scan
  - pathophysiologische Biomarker (einschließlich A $\beta$ -Protein, Tau-Protein)
  - keine der oben genannten
- 

**Perceptions regarding PRE-symptomatic DEMentia testing (PRE-ADS)**

Bitte bewerten Sie auf einer Skala von 1 bis 5, in welchem Maße Sie den Aussagen jeweils zustimmen (1 = ich stimme überhaupt nicht zu; 2 = ich stimme nicht zu; 3 = ich weiß es nicht; 4 = ich stimme zu; 5 = ich stimme vollkommen zu)

\* Umgekehrt kodiert

AKZEPTANZ DES DEMENZ-SCREENINGS UND DER BEDARF AN WISSEN

---

1. Ich würde gerne wissen, ob ich ein höheres Risiko als andere habe, an Alzheimer/Demenz zu erkranken.
2. Ich würde gerne regelmäßig anhand eines kurzen Fragebogens auf Alzheimer/Demenz getestet werden.



3. Ich würde gerne einen Gentest (mit einer Blutprobe) machen, um festzustellen, ob ich ein höheres Risiko habe, an Alzheimer/Demenz zu erkranken.
4. Ich würde gerne regelmäßig anhand von Bildern von meinem Kopf oder Gehirn (CT-Scan oder MRT) auf Alzheimer/Demenz getestet werden.
5. Ich würde gerne regelmäßig anhand von Biomarkern im Liquor (A $\beta$ -Amyloid, Tau-Protein) auf Alzheimer/Demenz getestet werden.
6. Um entscheiden zu können, ob ich mich auf Alzheimer/Demenz testen lassen würde, bräuchte ich mehr Informationen und Details.
7. Wenn mir mitgeteilt werden würde, dass ich ein erhöhtes Risiko für Alzheimer/Demenz habe, würde ich dies gerne mit meinem Arzt oder einem anderen Experten auf diesem Gebiet weiter besprechen und mich beraten lassen.
8. Wenn mir mitgeteilt werden würde, dass ich ein erhöhtes Risiko für Alzheimer/Demenz habe, würde ich dies gerne mit einer medizinischen Fachkraft, einem Experten für Genetik, unterhalten, um über meine Gefühle und Gedanken zu sprechen.

---

#### BEWEGGRÜNDE UND HINDERNISSE FÜR DIE UNTERSUCHUNG AUF BIOMARKER FÜR ALZHEIMER/DEMENZ

Wenn Ihnen mitgeteilt werden würde, dass Sie ein erhöhtes Risiko für Alzheimer/Demenz haben, inwieweit würden Sie die folgenden Aussagen treffen? Wählen Sie bitte jeweils eine Antwort.

---

- 9.\* Meine Familie würde unter den zusätzlichen Kosten für meine Pflege leiden.
- 10.\* Meine Familie würde emotional belastet werden.
- 11.\* Ich glaube, dass ich von seelischen Schmerzen überwältigt werden würde.
- 12.\* Ich glaube, dass ich von starken Ängsten überwältigt werden würde.
13. Ich würde meine Lebensqualität verbessern.
14. Ich würde motiviert sein, mich über neue Entwicklungen in der Behandlung und Prävention von Alzheimer/Demenz auf dem Laufenden zu halten.
- 15.\* Meine Familie würde finanziell leiden.
- 16.\* Meine Familie würde emotional leiden.
17. Meine Familie hätte eine bessere Möglichkeit, für mich zu sorgen.
- 18.\* Ich denke, dass andere mich anders behandeln werden.
- 19.\* Ich wäre deprimiert.

- 20.\* Ich wäre ängstlich.
- 21.\* Ich würde das Leben aufgeben.
- 22. Ich hätte mehr Zeit, um meine Zukunft zu planen.
- 23. Ich hätte mehr Zeit, um mit meiner Familie über meine Gesundheitsversorgung zu sprechen.
- 24. Ich hätte mehr Zeit, um mit meiner Familie über meine Finanzen zu sprechen.
- 25. Ich wäre motiviert, einen gesünderen Lebensstil zu führen (körperliche Bewegung, Ernährung, Vitamine, geistige Stimulation, mit dem Rauchen aufhören).

---

\*Reverse-coded items.
